# Supplementary material
Source: PubMed Central journal article supplement (PMC9790476)
Supplement: JOR-40-2510-s001.pdf [file JOR-40-2510-s001.pdf]

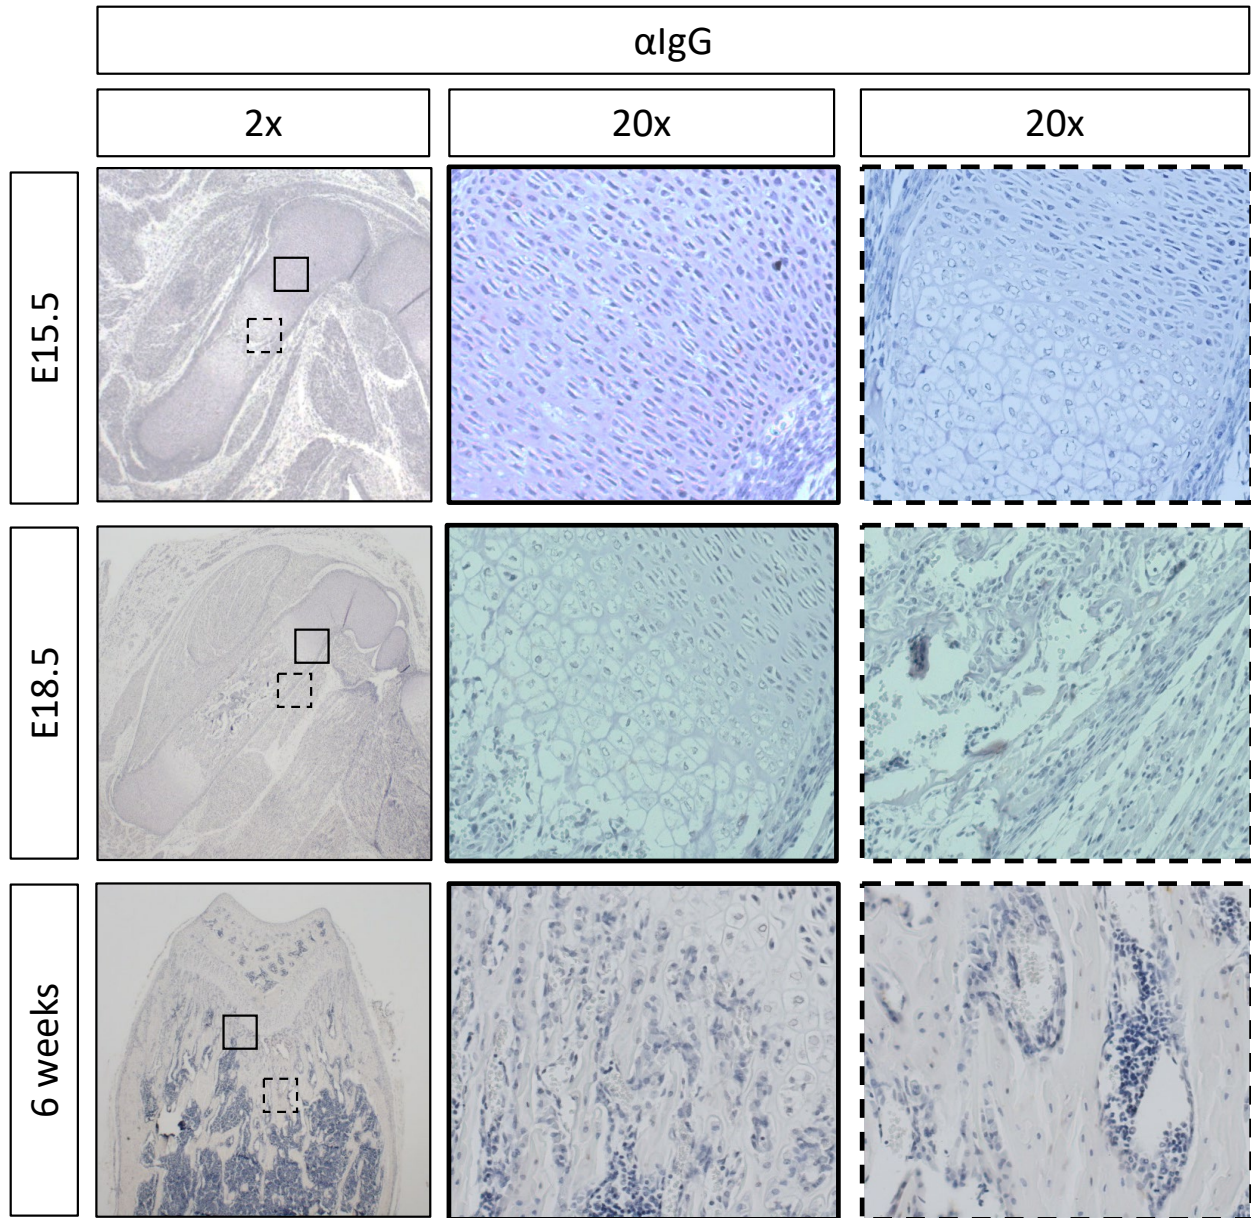

**Supplementary Figure 1:** IgG control staining for Figure 1

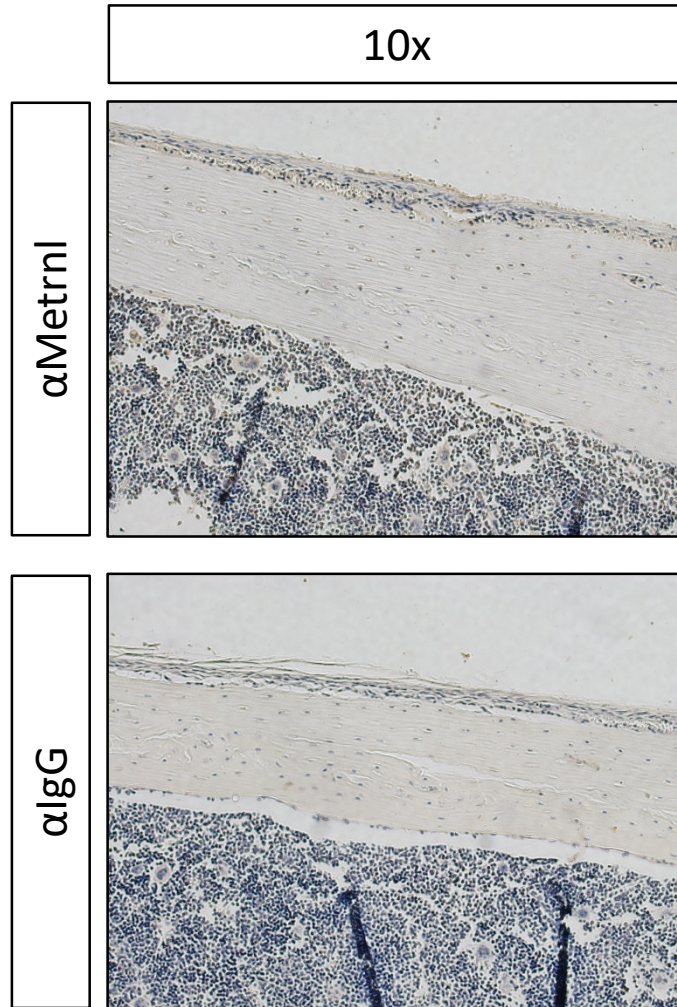

**Supplementary Figure 2:** IHC of 6-week old femoral diaphysis.

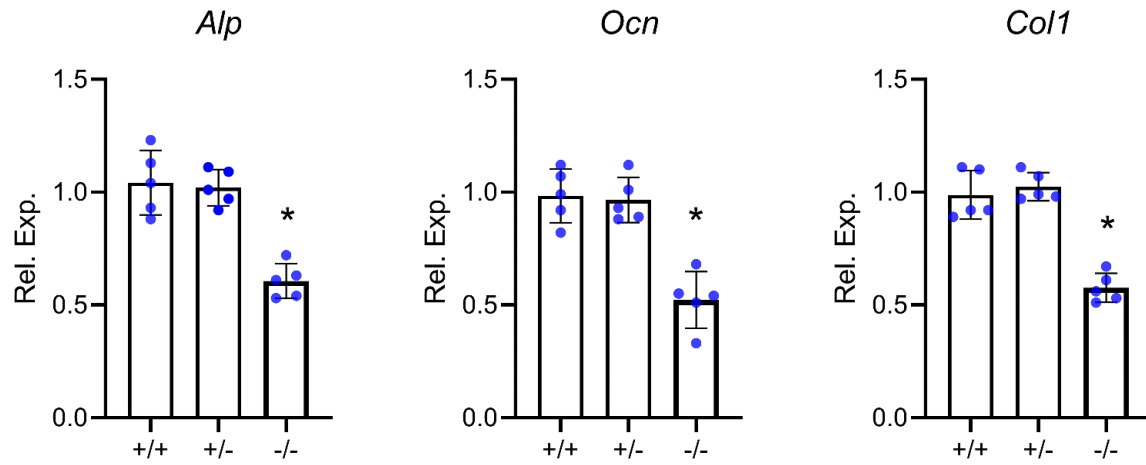

**Supplementary Figure 3:** Measurement of osteogenic transcripts during differentiation of bone marrow stromal cells.

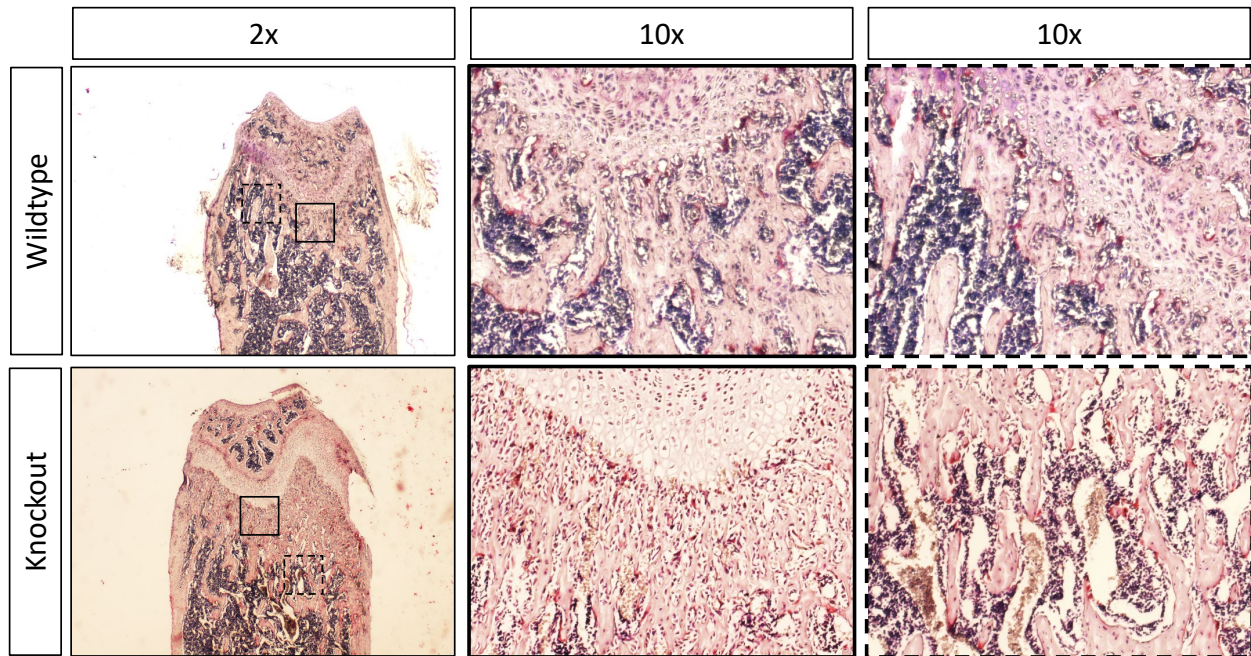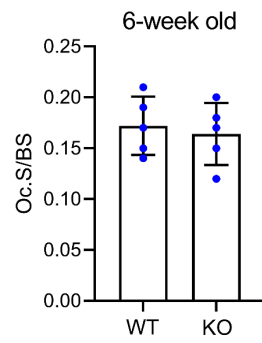

**Supplemental Figure 4:** TRAP staining of femurs from 6-week old littermates.

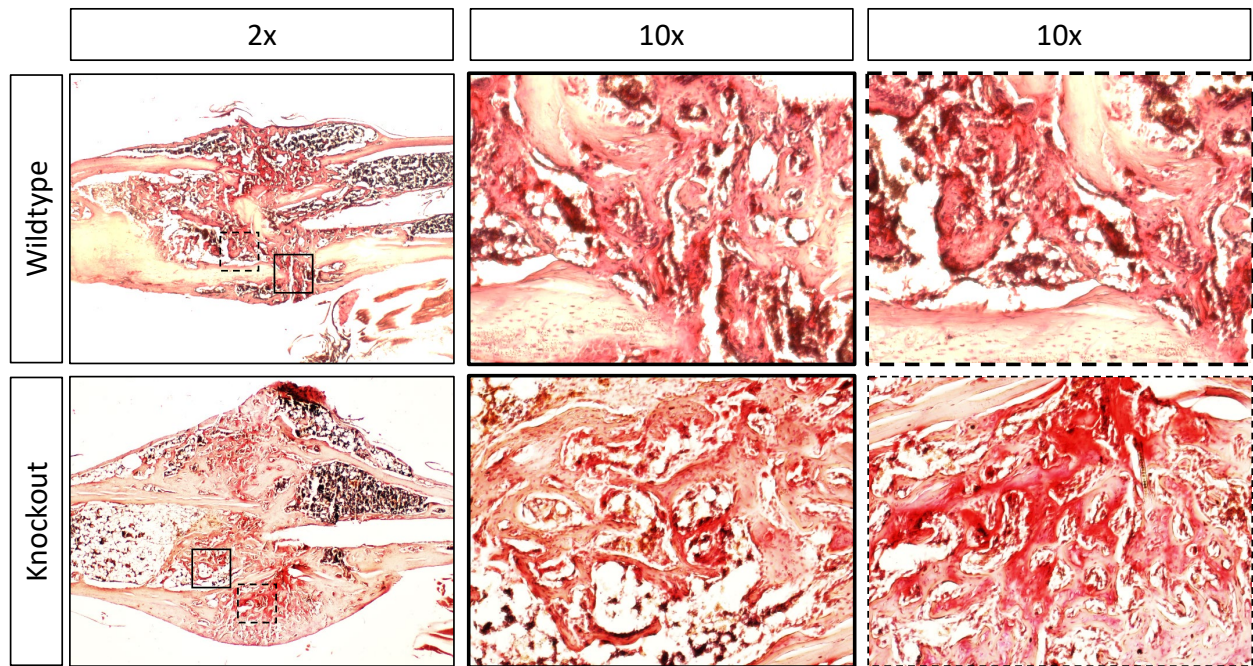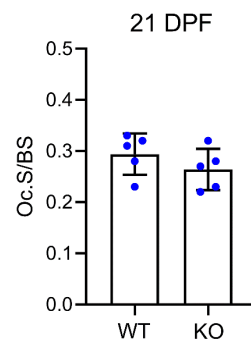

**Supplemental Figure 5:** TRAP staining of 21-day fracture calluses from 4-month old littermates.

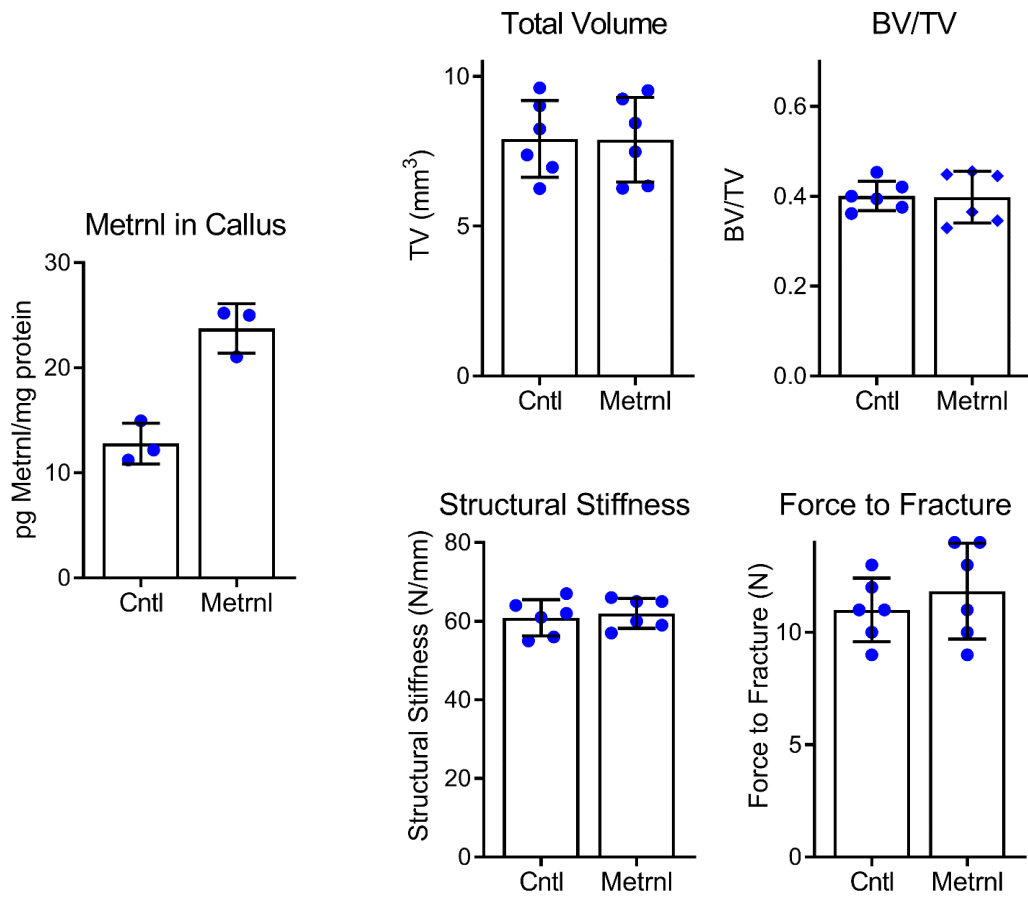

**Supplementary Figure 6:** Induction of Metrnl expression did not alter assessed bone fracture healing 21 days post injury (AAV-GFP, Cntl; AAV-GFP-Metrnl, Metrnl).
